# Supplementary material for: Contrasting Phylogeography of Sandy vs. Rocky Supralittoral Isopods in the Megadiverse and Geologically Dynamic Gulf of California and Adjacent Areas
Source: PubMed Central journal article supplement (PMC3699670; doi:10.1371/journal.pone.0067827), 2013-07-02

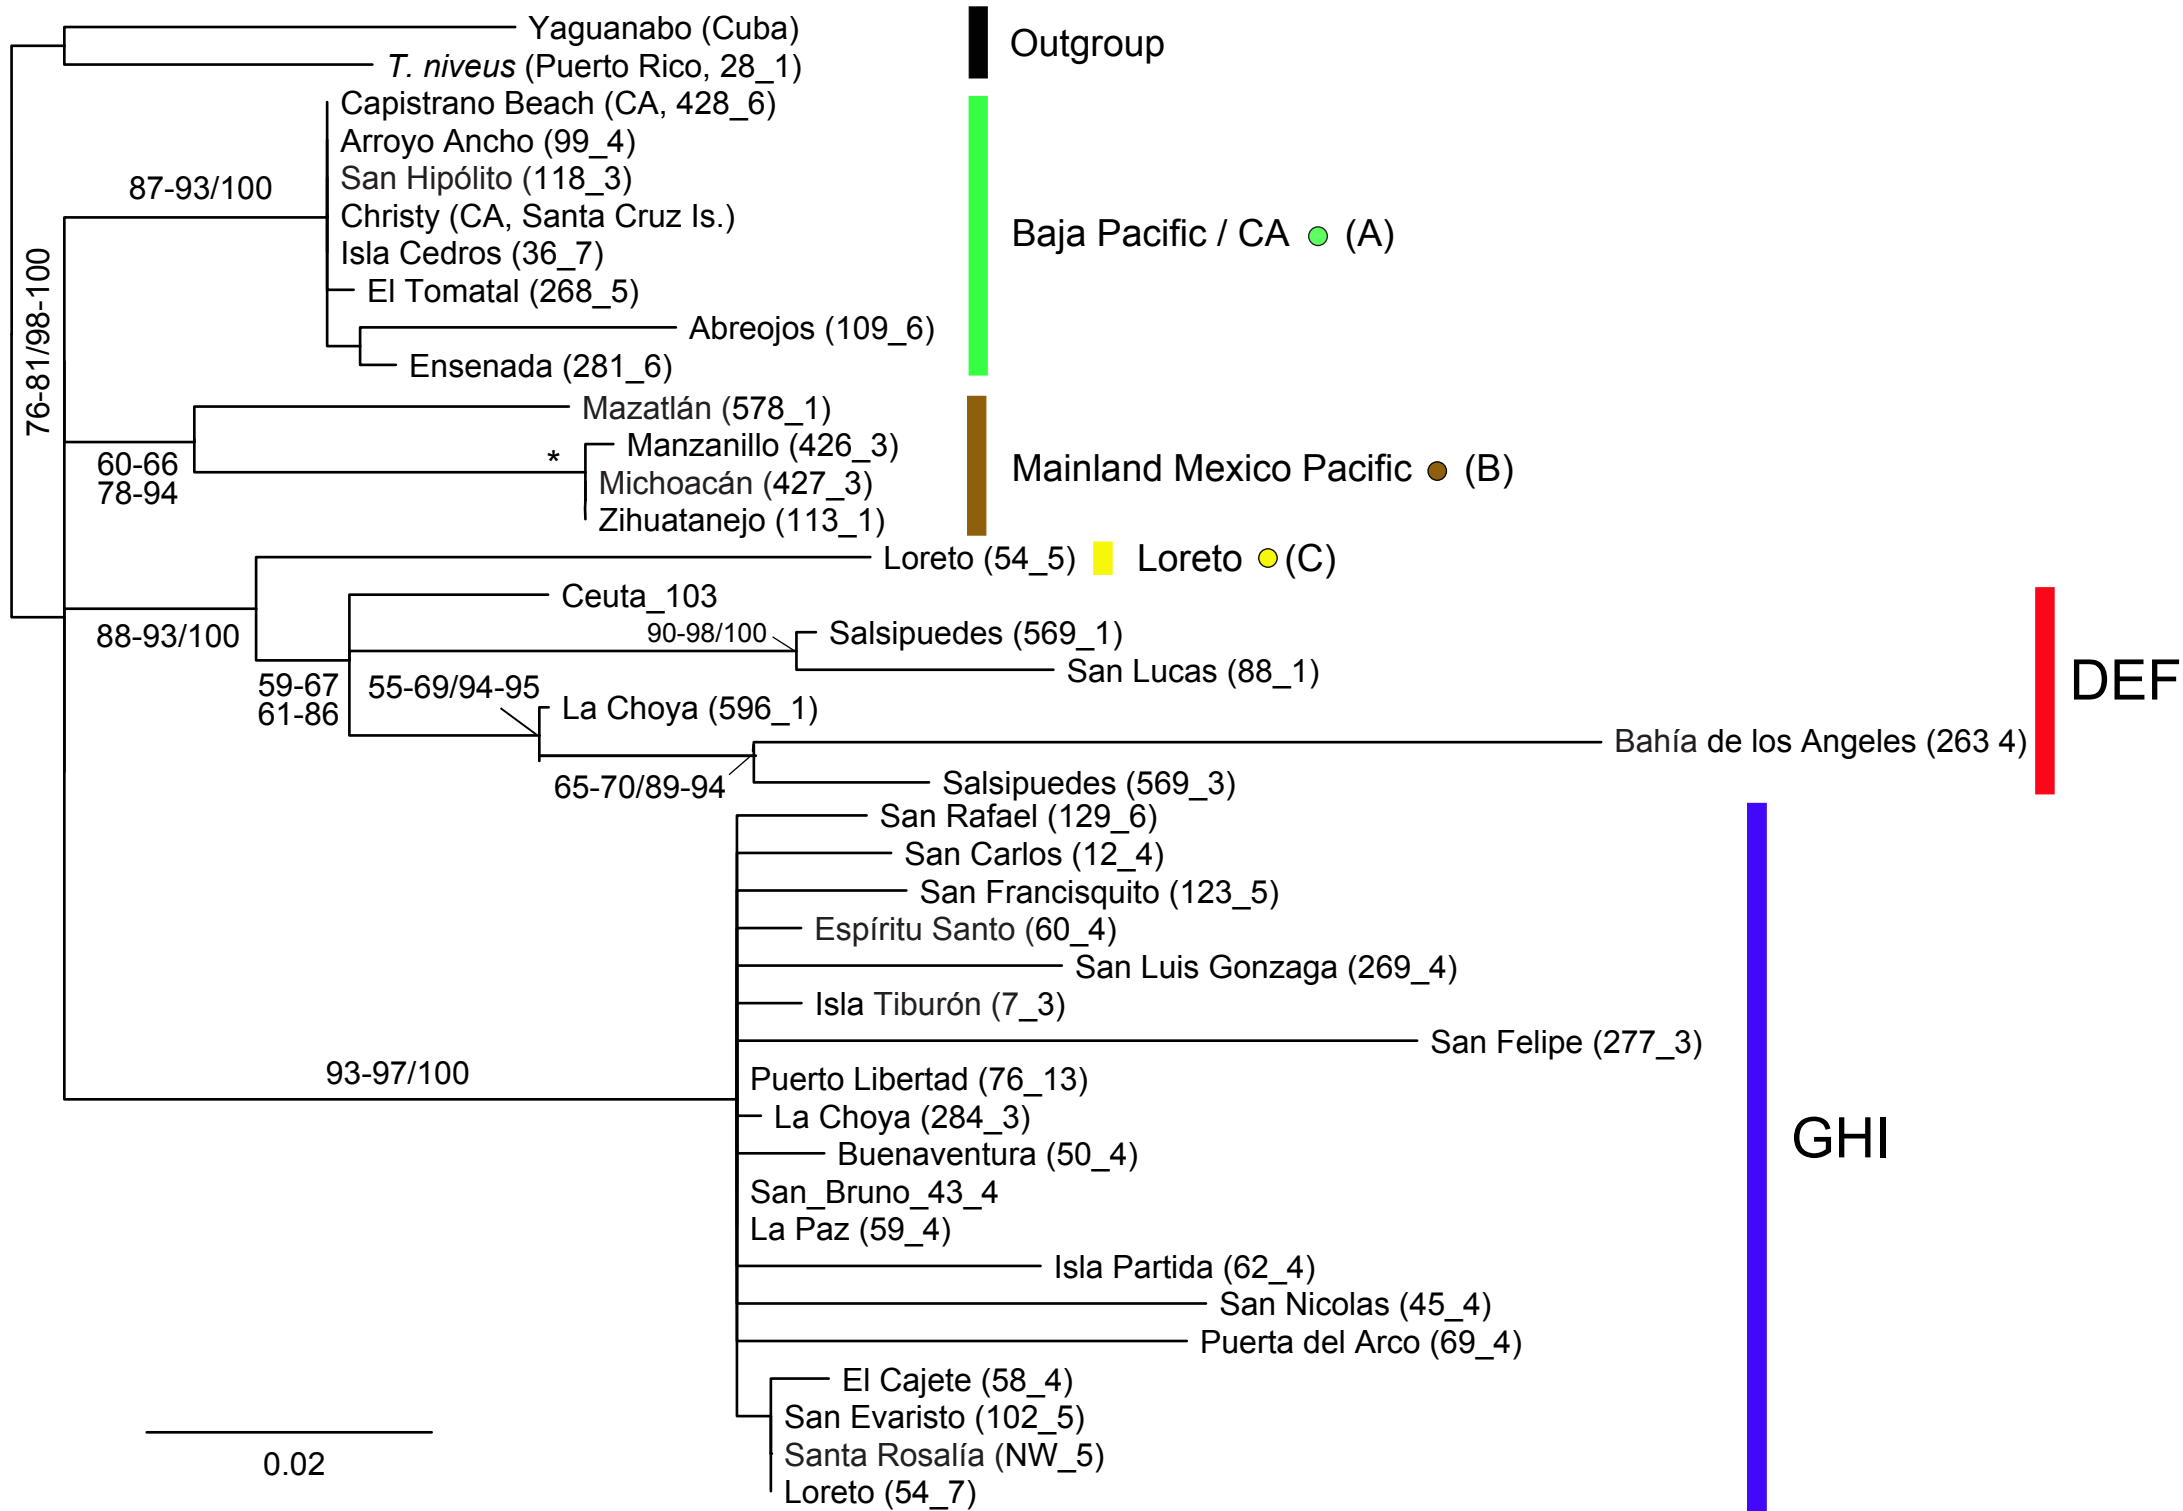

Supplement: pone.0067827.s003.pdf [file pone.0067827.s003.pdf]
