# Supplementary material for: Contrasting Phylogeography of Sandy vs. Rocky Supralittoral Isopods in the Megadiverse and Geologically Dynamic Gulf of California and Adjacent Areas
Source: PubMed Central journal article supplement (PMC3699670; doi:10.1371/journal.pone.0067827), 2013-07-02
Supplement: pone.0067827.s004.pdf [file pone.0067827.s004.pdf]

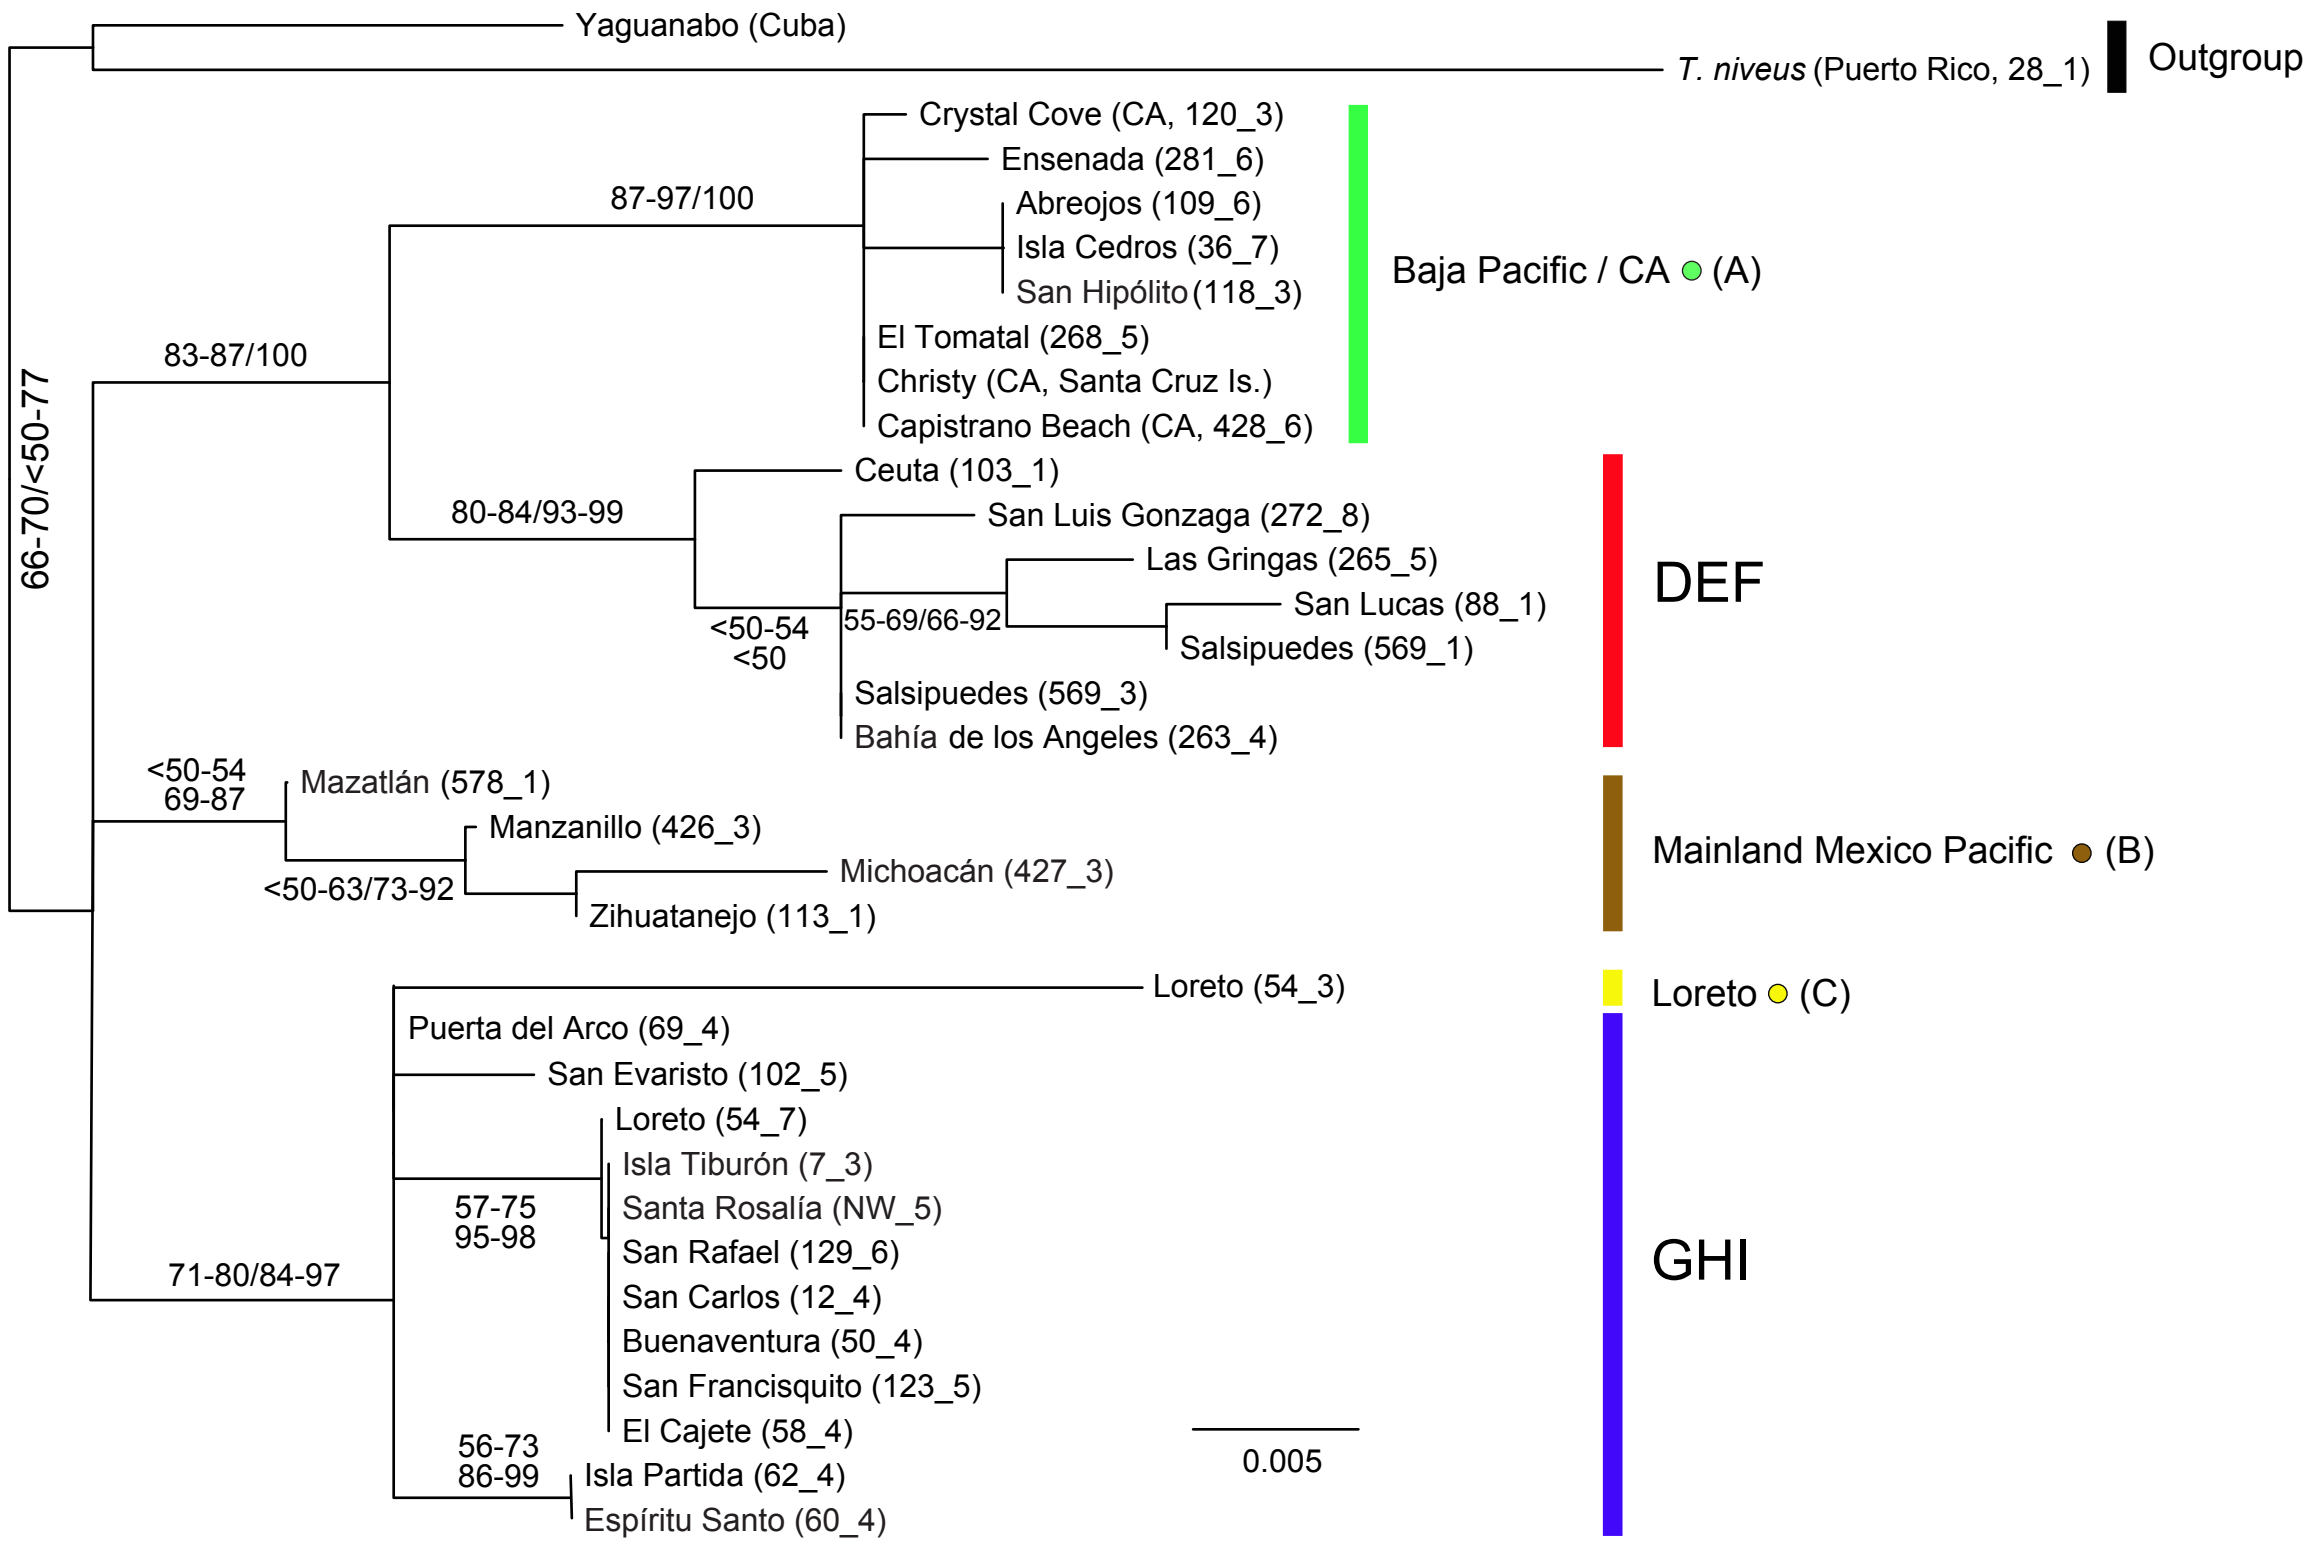

Yaguanabo (Cuba)

*T. niveus* (Puerto Rico, 28\_1) | Outgroup

87-97/100

Baja Pacific / CA ● (A)

83-87/100

66-70/<50-77

80-84/93-99

DEF

<50-54  
<50

55-69/66-92

<50-54  
69-87

Mainland Mexico Pacific ● (B)

<50-63/73-92

Loreto ● (C)

71-80/84-97

GHI

56-73  
86-99

0.005
