# Supplementary material for: Contrasting Phylogeography of Sandy vs. Rocky Supralittoral Isopods in the Megadiverse and Geologically Dynamic Gulf of California and Adjacent Areas
Source: PubMed Central journal article supplement (PMC3699670; doi:10.1371/journal.pone.0067827), 2013-07-02
Supplement: pone.0067827.s005.pdf [file pone.0067827.s005.pdf]

***Tylos punctatus***  
**syntype**

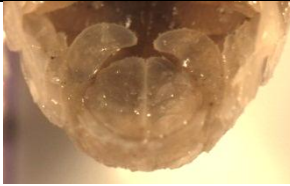

***Tylos punctatus***  
San Diego, California  
**USNM 89583**

***Clade A***  
**(Baja Pacific / California)**

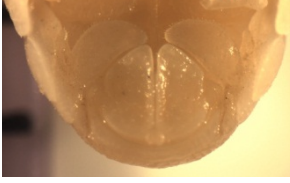

Sea Cliff (USNM 236471)

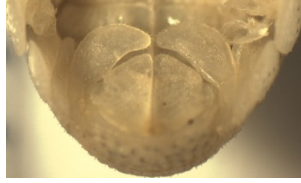

Christy 3

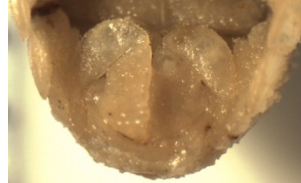

Crystal 120\_2

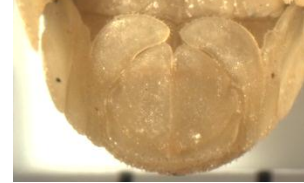

Capistrano 428\_5

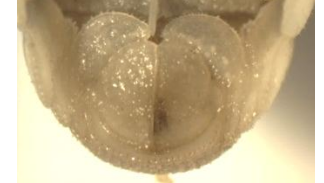

Ensenada 281\_6

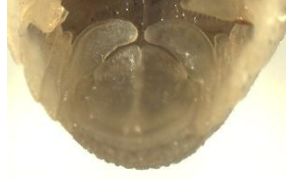

Arroyo Ancho 99\_4

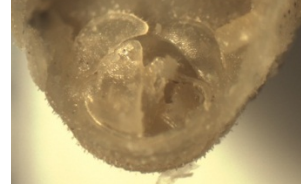

Isla Cedros 36\_6

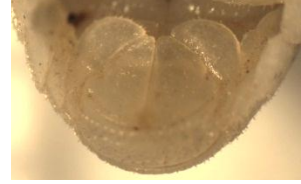

El Tomatal 268\_5

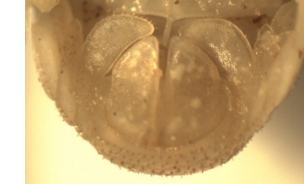

San Hipólito 118\_4

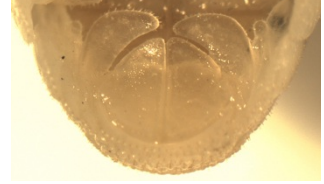

Abreojos 109\_3

***Clade B***  
**(Mainland Mexico Pacific)**

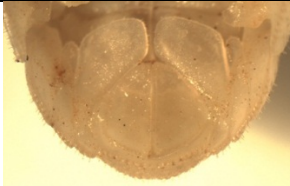

Mazatlán 578\_2

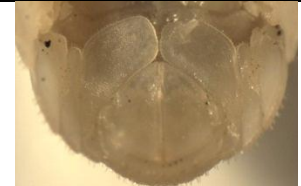

Mazatlán 579\_2

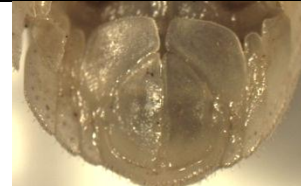

Manzanillo 426\_3

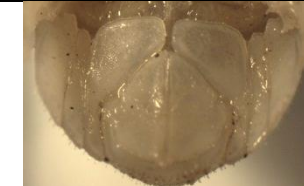

Michoacán 427\_1

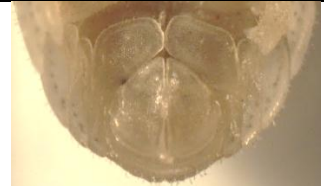

Zihuatanejo 113\_2

***Lineage C***  
**(Loreto)**

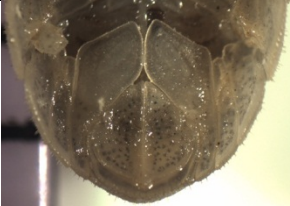

Loreto 54\_1

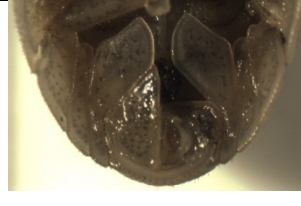

Loreto 54\_3

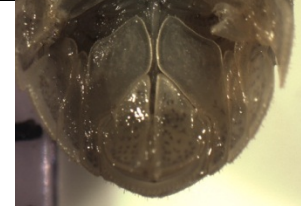

Loreto 54\_4

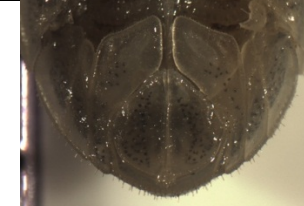

Loreto 54\_5

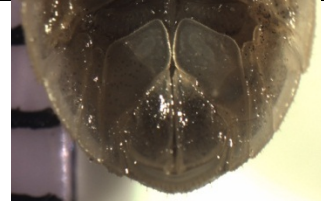

Loreto\_54\_6

**Clade E**

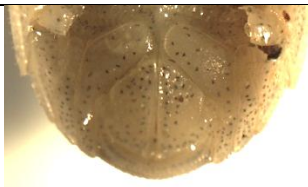

Bahía de los Angeles  
262\_4

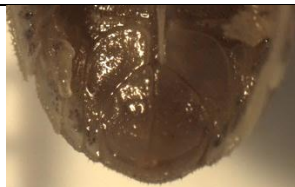

San Luis Gonzaga 272\_6

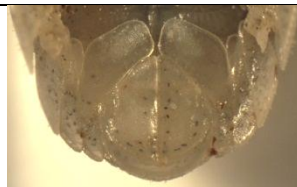

Salsipuedes 569\_3

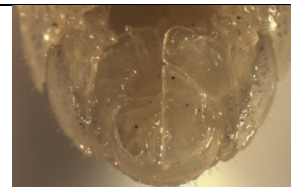

Puerto Libertad 76\_14

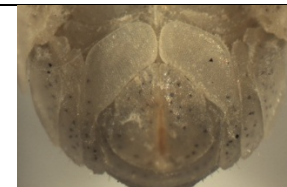

Choya 596\_1

**Clade F**

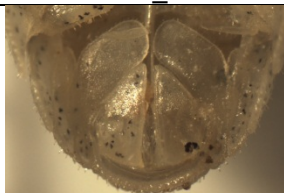

Las Gringas 265\_8

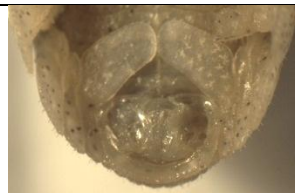

Las Gringas 265\_4

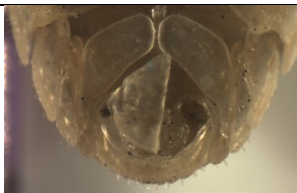

Bahía de los Angeles  
394\_1

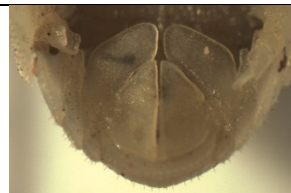

San Lucas 88\_2

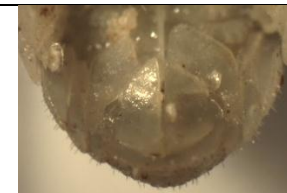

Salsipuedes 569\_1

**Clade G  
(North)**

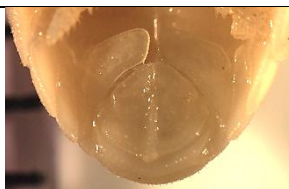

Puerto Peñasco (USNM  
112670)

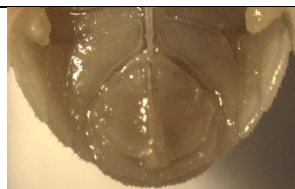

Choya 284\_2

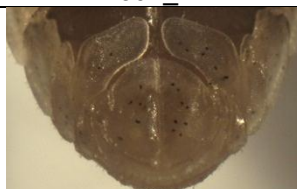

Puerto Libertad 76\_13

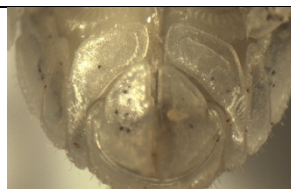

San Carlos 12\_4

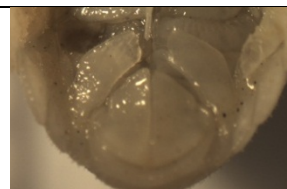

San Felipe 277\_2

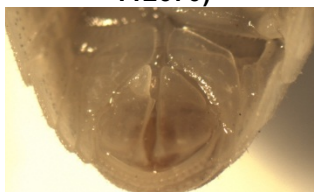

San Luis Gonzaga 269\_4

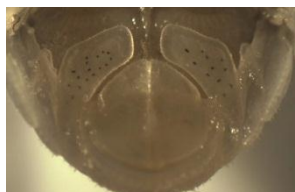

Isla Tiburón 7\_3

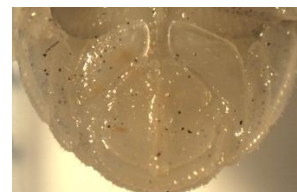

Bahía de los Angeles  
W\_2

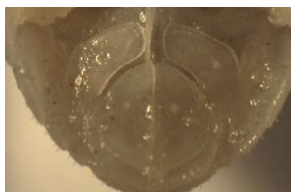

San Rafael 129\_6

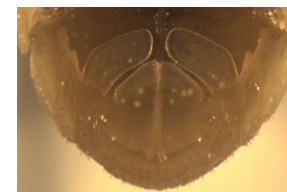

San Francisquito 123\_5

**Clade H  
(Middle)**

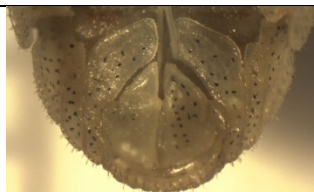

Santa Rosalía NW\_3

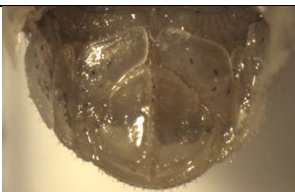

San Nicolás 45\_3

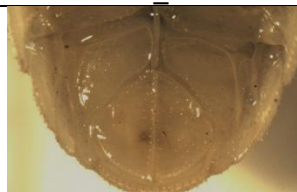

Buenaventura 50\_4

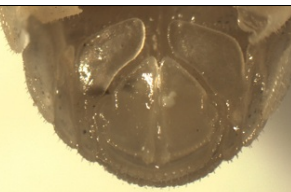

San Bruno 43\_3

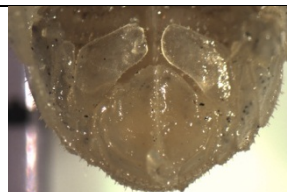

Loreto 54\_8



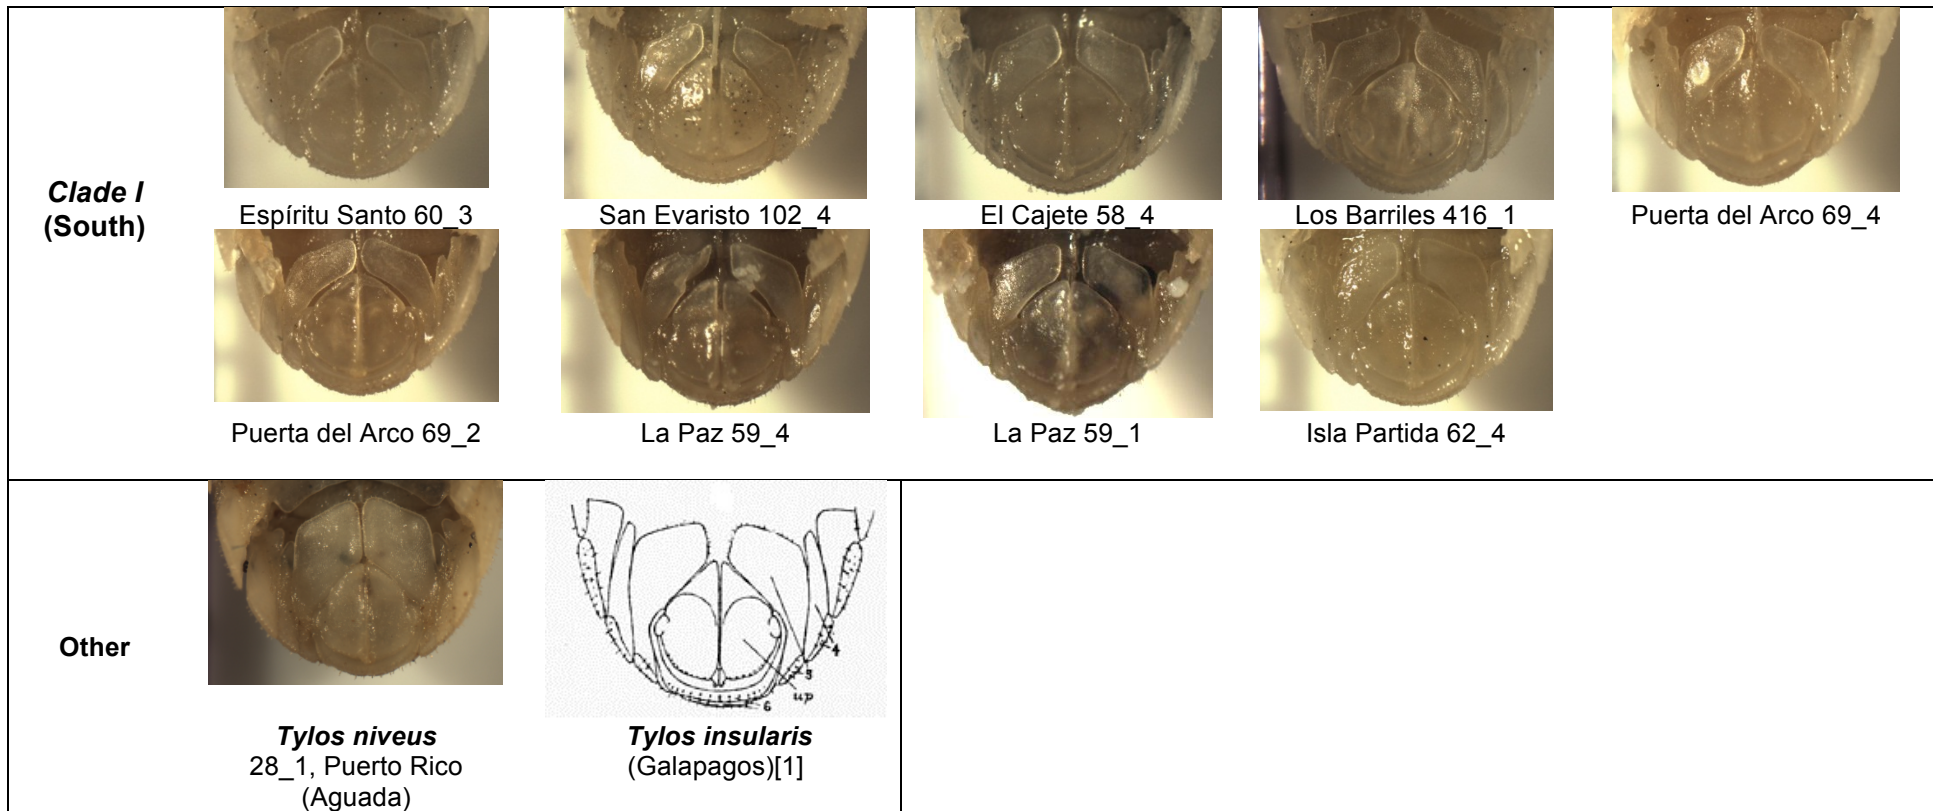

## References

1. Van Name WG (1924) Isopods from the Williams Galapagos Expedition. Zoologica 5: 181–210
